# Supplementary material for: Pollution transport and transformation over the Po Plain as revealed by airborne and ground-based measurements in July 2017 during EMeRGe
Source: Copernicus journal article supplement (doi:10.5194/egusphere-2025-6458), 2026-01-23
Supplement: Supplementary file 1 [file egusphere-2025-6458-supplement.pdf]

## Supplementary information

### S1 Population density of the Po Valley

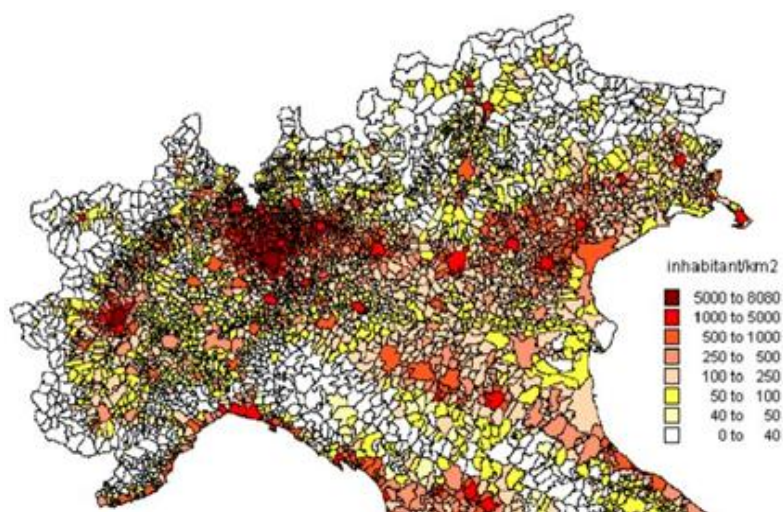

**Figure S1.** Population density of the Po Valley region. The most populated areas are Milan (north, north-west) and Turin (west). Source: Baklanov and Mahura, 2010.

### S2 Emission sources of pollutants in the Po Valley

**Table S2.** Percentage of the different emission sources classified by macro-sectors (MS) for the Po Valley, 2013. Source: Raffaelli et al. (2020).

| Macro-sectors                                                          | NH <sub>3</sub> | Non-Methane Organic Compound (NMVOC) | NMVOC without MS10 and MS11 | NO <sub>x</sub> | PM <sub>10</sub> | SO <sub>2</sub> |
|------------------------------------------------------------------------|-----------------|--------------------------------------|-----------------------------|-----------------|------------------|-----------------|
| MS1 – Combustion in energy and transformation industries               | 0%              | 0%                                   | 0%                          | 6%              | 1%               | 18%             |
| MS2 – Non-industrial combustion plants                                 | 0%              | 5%                                   | 11%                         | 9%              | 56%              | 7%              |
| MS3 – Combustion in manufacturing industry                             | 0%              | 1%                                   | 2%                          | 15%             | 4%               | 41%             |
| MS4 – Production processes                                             | 0%              | 4%                                   | 9%                          | 3%              | 3%               | 21%             |
| MS5 – Extraction and distribution of fossil fuel and geothermal energy | 0%              | 2%                                   | 4%                          | 0%              | 0%               | 0%              |
| MS6 – Solvent and other product                                        | 0%              | 28%                                  | 58%                         | 0%              | 5%               | 0%              |
| MS7 – Road transport                                                   | 1%              | 6%                                   | 14%                         | 50%             | 20%              | 1%              |
| MS8 – Other mobile sources and machinery                               | 0%              | 1%                                   | 2%                          | 13%             | 4%               | 10%             |
| MS9 – Waste treatment and disposal                                     | 1%              | 0%                                   | 0%                          | 1%              | 0%               | 2%              |
| MS10 – Agriculture                                                     | 97%             | 22%                                  | 0%                          | 1%              | 4%               | 0%              |
| MS11 – Other sources and sinks                                         | 0%              | 31%                                  | 0%                          | 0%              | 3%               | 0%              |
| Total Emissions                                                        | 100%            | 100%                                 | 100%                        | 100%            | 100%             | 100%            |

### S3 International studies investigating pollution pathways over the Po Valley

- The TRANSALP project was carried out as part of EUROTRAC/TRACT 1989-1991 (European Experiment on Transport and Transformation of Environmentally Relevant Trace Constituents in the Troposphere over Europe/ Transport of Air Pollutants over Complex Terrain). It comprised three tracer field experiments (1989, 1990, and 1991) performed in the south of Switzerland to evaluate the meso-scale transport and diffusion of pollutants across the Alps. The experiments studied the complex mountain topography, focusing on the mountain-plain circulation system and the meteorological conditions that favour the exchange of transalpine air masses and proved the occurrence of transport in the south-north direction (Ambrosetti et al., 1998).

- PIPAPO (Pianura Padana Produzione di Ozono) campaign (May-June 1998) was part of the EUROTRAC-2 LOOP (Limitation Of Oxidant Production) subproject and combined airborne and ground-based measurements with chemical transport models to analyse VOC/NO<sub>x</sub> sensitivity of O<sub>3</sub> production in the Milan plume and pollutants dispersion in the surrounding region. The results of PIPAPO showed the recirculation of polluted air masses in the emission area of Milan, after their injection in the mountain valleys. No evidence of transalpine flow of pollution was found during the project. However, as this study specifically targeted the surroundings of Milan and not the neighbouring regions and was restricted to the late spring months of May and June, it cannot be considered representative for the PP dispersion of pollutants (Neftel et al., 2002; Dosio et al., 2002).
- EU FP7 projects MEGAPOLI and CityZen included the PP among the investigated major population centres (MPCs). The two projects took place in the period 2008-2011 to assess the effect of MPC emissions on a larger scale and investigate the exchange with the neighbouring regions (Baklanov, 2011; Gauss, 2011). MEGAPOLI showed that under anti-cyclonic conditions, the PP footprint extends to southern Europe and northern Italy, while larger urban agglomerates like Milan are responsible for high levels of PM<sub>2.5</sub> inside the region (Baklanov, 2011).
- The APPRAISAL survey (2011-2014) was a further instrument of the EU FP7 to investigate air quality management in Europe. A section of the project dealt with the PP region Emilia-Romagna and listed the abatement strategies for NH<sub>3</sub>, NO<sub>x</sub> and PM<sub>10</sub> (Belis et al., 2017).
- In 2017, EU LIFE-IP Clean Air PREPAIR (Po Regions Engaged to Policies of Air; <https://www.lifeprepare.eu/>) started after the stipulation of an agreement between the governments of Italy and Slovenia, the administrative PP regions, and their environmental organisations. Slovenia was involved in the project in order to extend the air pollution management to the Adriatic Sea area. The objectives of LIFE-IP-PREPAIR are the reduction of pollution levels in the PP through the implementation of abatement strategies and the evaluation of their effectiveness. Another aim of the project is to raise the environmental awareness in the community and create a network at the national and regional level between researchers, political and socio-economical entities. The project is due to end in 2024 (Raffaelli et al., 2020).
- RI-URBANS (2021-2025, <https://riurbans.eu>) is a H2020 Green Deal Project that integrates European air quality monitoring networks with research infrastructures (RI), e.g., ACTRIS, ICOS, IAGOS, to enhance real-time observations of atmospheric pollutants, including aerosols. The Po Valley is a key pilot area where advanced monitoring techniques are tested to assess air pollution exposure, with specific activities in Milan and Bologna focusing on black carbon, particulate matter composition, and urban pollution sources (Apituley et al., 2024).
- TEAMx (Rotach et al, 2022; <https://www.teamx-programme.org/>) investigates atmospheric exchange processes over mountainous regions, with some observational campaigns extending to areas near the Po Valley. Using ground-based, remote sensing, and aircraft measurements, the initiative helps improve the understanding of boundary layer dynamics and transport processes, which influence aerosol distribution and air quality in the surrounding regions.
- MAIA (Diner et al; 2018; <https://maia.jpl.nasa.gov>) is a partnership between NASA and the Italian Space Agency (Agenzia Spaziale Italiana or ASI) aimed at studying the health effects of airborne particulate matter. It combines surface-based air monitoring data and satellite observations to analyze aerosol composition, pollution variability, and in turn potential health impacts. To support ASI research goals, three MAIA primary

target areas have been established in Italy. These cover a number of cities including main urban centers in the Po valley such as Milan, Turin, and Bologna.

#### S4 Tracks of E-EU-03 and E-EU-06

**Table S4.** Approximate time and location of altitude changes as indicated in Fig.S3: a) E-EU-03, and b) E-EU-06. Altitudes are given in m above sea level (a.s.l.)

a)

| waypoints | date and time (UTC) | (lat. °N, long. °E) | altitude a.s.l. (m) |
|-----------|---------------------|---------------------|---------------------|
| 3a        | 11.07.2017 10:34    | (45.7, 11)          | 5430                |
| 3b        | 11.07.2017 10:39    | (45.6, 10.6)        | 3530                |
| 3c        | 11.07.2017 10:49    | (45.6, 9.6)         | 3530                |
| 3d        | 11.07.2017 10:51    | (45.6, 9.5)         | 2900                |
| 3e        | 11.07.2017 15:26    | (45.6, 11.7)        | 1010                |
| 3f        | 11.07.2017 15:31    | (45.5, 11.8)        | 3220                |
| 3g        | 11.07.2017 15:39    | (45.4, 12.6)        | 3220                |

b)

| waypoints | date and time (UTC) | (lat. °N, long. °E) | altitude a.s.l. (m) |
|-----------|---------------------|---------------------|---------------------|
| 6         | 2017-07-20 09:42    | (45.5, 13.4)        | 3200                |
| 6a        | 2017-07-20 09:49    | (44.9, 13.5)        | 3200                |
| 6b        | 2017-07-20 09:53    | (45.1, 13.5)        | 1630                |
| 6c        | 2017-07-20 09:59    | (45.5, 13.4)        | 1630                |
| 6d        | 2017-07-20 10:02    | (45.3, 13.4)        | 520                 |
| 6e        | 2017-07-20 10:10    | (44.9, 13.4)        | 520                 |
| 6f        | 2017-07-20 10:21    | (44.8, 12.6)        | 520                 |
| 6g        | 2017-7-20 10:37     | (45.7, 13.2)        | 520                 |
| 6h        | 2017-7-20 10:39     | (45.6, 13.1)        | 1600                |
| 6i        | 2017-7-20 10:54     | (44.8, 12.5)        | 1600                |
| 6j        | 2017-7-20 10:58     | (44.9, 12.6)        | 3220                |
| 6k        | 2017-7-20 11:10     | (45.7, 13.2)        | 3220                |
| 6l        | 2017-7-20 11:19     | (45.3, 12.8)        | 840                 |
| 6m        | 2017-7-20 12:07     | (44.9, 9)           | 840                 |
| 6n        | 2017-7-20 12:11     | (44.6, 9)           | 2590                |
| 6o        | 2017-7-20 12:19     | (44.1, 9)           | 2590                |

### S5 Distribution of emissions in the PP

The ARPAs (Environmental Protection Regional Agencies) monitor the air quality in the Italian regions by measuring air composition through ground-based stations. In 2017 and 2015, the software INEMAR (INventario EMissioni ARia, <https://www.inemar.eu/>) and IREA (Inventario Regionale delle Emissioni in Atmosfera, <https://servizi.regione.piemonte.it/catalogo/inventario-regionale-delle-emissioni-atmosfera-irea>) were used to estimate annual emissions of the main macropollutants ( $\text{CO}_2$ ,  $\text{CO}$ ,  $\text{CH}_4$ ,  $\text{NO}_x$ ,  $\text{N}_2\text{O}$ ,  $\text{NH}_3$ ,  $\text{SO}_2$ , VOCs,  $\text{PM}_{2.5}$ , and  $\text{PM}_{10}$ ) from anthropogenic and biogenic sources in the PP regions. The emission sources are divided into 11 groups or macro-sectors based on the international classification EMEP (Co-operative Programme for Monitoring and Evaluation of Long Range Transmission of Air Pollution in Europe) – CORINAIR (CoORDination of Information on the Environment AIR emission)/SNAP (Selected Nomenclature for sources of Air Pollution). The total annual emissions (see Fig. S5.1) show that the provinces of Milan, Turin and Venice and the south of Lombardy are the main polluted areas. Figure S5.2 indicates the groups of emissions divided by region, showing that Lombardy is the most polluted region with main emitting groups G1 (Combustion in energy and transformation industry), G2 (Non-industrial combustion processes), G3 (Combustion in manufacturing industry), and G7 (Road transport).

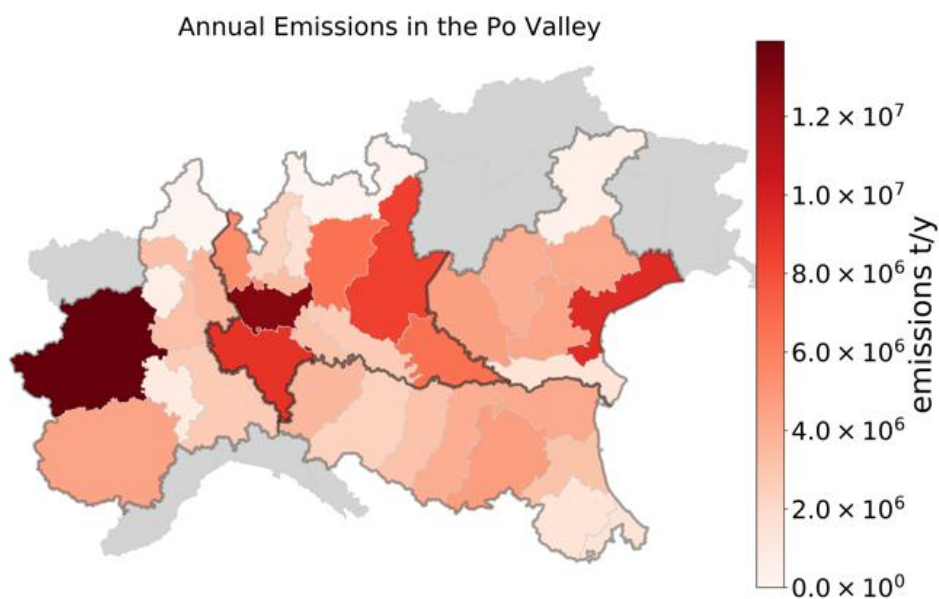

**Figure S5.1.** Emissions per province according to the EMEP-CORINAIR/SNAP classification. Data sources: IREA 2015, INEMAR 2017.

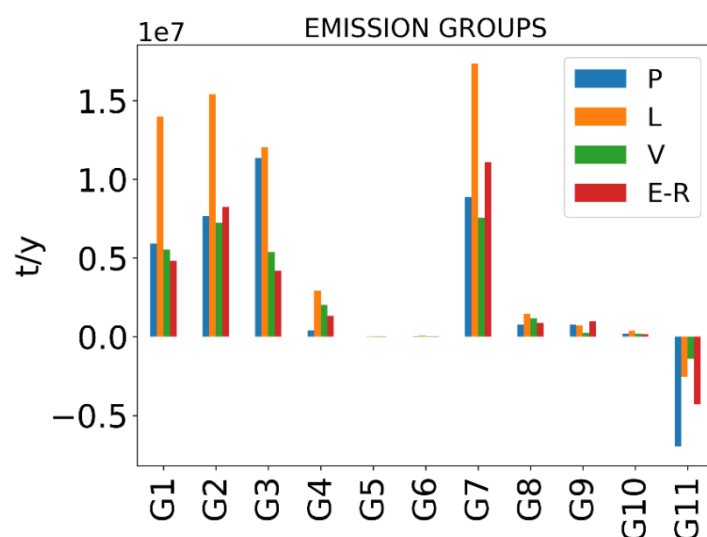

**Figure S5.2.** Emissions per region divided into groups of emission according to the EMEP-CORINAIR/SNAP classification. P is Piedmont, L is Lombardy, V is Veneto and E-R is Emilia-Romagna. Groups are: G1: Combustion in energy and transformation industry; G2: Non-industrial combustion processes; G3: Combustion in manufacturing industry; G4: Production processes; G5: Extraction and distribution of fossil fuels and geothermal energy; G6: Solvent and other product use; G7: Road transport; G8: Other mobile sources and machinery; G9: Waste treatment and disposal; G10: Agriculture; G11: Other sources and sinks. Data sources: IREA 2015, INEMAR 2017.

## S6 Ground-based stations of the ARPA air quality-monitoring system (AQMN)

**Table S6.1.** Ground-based stations selected along the flight track of the HALO flights. T: temperature, P: pressure, RH: relative humidity, ws: wind speed; wd: wind direction. Data source: ARPAs' dataset.

| station number | station name             | station type        | measurements                                                                                                        | time resolution          | (lat. °N, lon. °E) |
|----------------|--------------------------|---------------------|---------------------------------------------------------------------------------------------------------------------|--------------------------|--------------------|
| 1              | Novi Ligure-Gobetti      | Urban traffic       | NO, NO <sub>2</sub> , NO <sub>x</sub> , PM <sub>10</sub> , ws, wd                                                   | Hourly<br>(daily for PM) | (44.76, 8.8)       |
| 2              | Voghera Pozzoni          | Urban background    | NO <sub>2</sub> , NO <sub>x</sub> , O <sub>3</sub> , CO, C <sub>6</sub> H <sub>6</sub> , PM <sub>10</sub> , ws, wd  | Hourly<br>(daily for PM) | (45.0, 9.01)       |
| 3              | S. Rocco al Porto        | Suburban background | NO <sub>2</sub> , NO <sub>x</sub> , CO, PM <sub>10</sub>                                                            | Hourly<br>(daily for PM) | (45.08, 9.7)       |
| 4              | Cremona Fatebenefratelli | Urban background    | NO <sub>2</sub> , NO <sub>x</sub> , NH <sub>3</sub> , O <sub>3</sub> , CO, SO <sub>2</sub> , ws, wd                 | 1 hour                   | (45.14, 10.04)     |
| 5              | Viadana                  | Urban background    | NO <sub>2</sub> , NO <sub>x</sub> , O <sub>3</sub>                                                                  | Hourly                   | (44.92, 10.52)     |
| 6              | Mantova Gramsci          | Urban traffic       | NO <sub>2</sub> , NO <sub>x</sub> , CO, C <sub>6</sub> H <sub>6</sub> , SO <sub>2</sub> , PM <sub>10</sub> , ws, wd | Hourly<br>(daily for PM) | (45.15, 10.78)     |
| 7              | Rovigo Centro            | Urban traffic       | NO <sub>2</sub> , O <sub>3</sub> , CO, C <sub>6</sub> H <sub>6</sub> , SO <sub>2</sub> , PM <sub>10</sub> , ws, wd  | Hourly<br>(daily for PM) | (45.07, 11.78)     |
| 8              | Bra- Madonna Fiori       | Urban traffic       | NO, NO <sub>2</sub> , NO <sub>x</sub> , PM <sub>10</sub> , ws, wd                                                   | Hourly<br>(daily for PM) | (44.71, 7.84)      |
| 9              | Vinchio- San Michele     | Rural background    | NO, NO <sub>2</sub> , NO <sub>x</sub> , O <sub>3</sub> , PM <sub>10</sub> , PM <sub>2.5</sub> , ws, wd              | Hourly<br>(daily for PM) | (44.8, 8.31)       |
| 10             | Baldissero-Torinese      | Rural background    | NO, NO <sub>2</sub> , NO <sub>x</sub> , O <sub>3</sub> , CO, ws, wd                                                 | Hourly                   | (45.06, 7.8)       |

|    |                              |                     |                                                                                                                           |                       |                 |
|----|------------------------------|---------------------|---------------------------------------------------------------------------------------------------------------------------|-----------------------|-----------------|
| 11 | Novara- Verdi                | Urban background    | NO, NO <sub>2</sub> , NO <sub>x</sub> , O <sub>3</sub> , PM <sub>10</sub> , PM <sub>2.5</sub> , ws, wd                    | Hourly (daily for PM) | (45.44, 8.62)   |
| 12 | Saronno Santuario            | Urban background    | NO <sub>2</sub> , NO <sub>x</sub> , O <sub>3</sub> , PM <sub>10</sub> , ws, wd                                            | Hourly (daily for PM) | (45.63, 9.04)   |
| 13 | Sesto San Giovanni           | Urban traffic       | NO <sub>2</sub> , NO <sub>x</sub> , CO, PM <sub>2.5</sub> , ws, wd                                                        | Hourly (daily for PM) | (45.53, 9.24)   |
| 14 | Osio Sotto                   | Suburban background | NO <sub>2</sub> , NO <sub>x</sub> , O <sub>3</sub> , PM <sub>10</sub> , ws, wd                                            | Hourly (daily for PM) | (45.62, 9.61)   |
| 15 | Sarezzo                      | Urban background    | NO <sub>2</sub> , NO <sub>x</sub> , O <sub>3</sub> , CO, PM <sub>10</sub> , ws, wd                                        | Hourly (daily for PM) | (45.65, 10.21)  |
| 16 | Brescia Via Turati           | Urban traffic       | NO <sub>2</sub> , NO <sub>x</sub> , CO, C <sub>6</sub> H <sub>6</sub> , ws, wd                                            | Hourly                | (45.54, 10.23)  |
| 17 | San Felice                   | Urban traffic       | NO <sub>2</sub> , CO, SO <sub>2</sub>                                                                                     | Hourly                | (45.55, 11.53)  |
| 18 | Bassano                      | Urban background    | NO <sub>2</sub> , O <sub>3</sub> , PM <sub>2.5</sub> , ws, wd                                                             | Hourly (daily for PM) | (45.76, 11.74)  |
| 19 | Padova Arcella               | Urban traffic       | NO <sub>2</sub> , CO, PM <sub>10</sub> , ws, wd                                                                           | Hourly (daily for PM) | (45.43, 11.89)  |
| 20 | Genoa_Genova - Quarto        | Urban background    | NO, NO <sub>2</sub> , O <sub>3</sub> , SO <sub>2</sub>                                                                    | Hourly                | (44.39, 8.99)   |
| 21 | Genoa_Genova – Corso Firenze | Urban background    | NO, NO <sub>2</sub> , O <sub>3</sub> , CO, SO <sub>2</sub>                                                                | Hourly                | (44.42, 8.93)   |
| 22 | Genoa_Genova – Via Buoizzi   | Urban traffic       | NO, NO <sub>2</sub> , CO, SO <sub>2</sub>                                                                                 | Hourly                | (44.41, 8.91)   |
| 23 | Ispra                        | Rural background    | NO, NO <sub>2</sub> , O <sub>3</sub> , CO, SO <sub>2</sub> , PM <sub>10</sub> , ws, wd, air T, RH, air P, solar radiation | 10-minutes            | (45.807, 8.631) |

**Table S6.2.** Ground-based trace gas instrumentation of the ARPA AQMN stations

| Species                               | Technique/ Instrument               |
|---------------------------------------|-------------------------------------|
| NO, NO <sub>2</sub> , NO <sub>x</sub> | Chemiluminescence                   |
| CO                                    | Spectrophotometry IR                |
| SO <sub>2</sub>                       | Molecular Fluorescence Spectroscopy |
| O <sub>3</sub>                        | UV-photometry                       |

## S7 LiDAR instruments

Vertical profiles from the following LiDAR systems were considered in this work:

- Automated Lidar-Ceilometer (ALC) located at the University Milano Bicocca as part of the Italian ALICENET network. It is an OTT\_HydroMet (former Lufft) CHM15k-Nimbus working at a single wavelength of 1064 nm, with a 15 s temporal resolution and 15 m vertical resolution. Detailed information on the ALICENET network and data processing are given in Bellini et al. (2024)
- UV LIDAR in San Pietro Capofiume, operated by the University of Naples Federico II (Boselli et al, 2021). It was working at a wavelength of 355 nm, with depolarisation capabilities. The particle backscatter coefficient  $\beta_p$  and particle linear depolarization ratio  $\delta_p$  profiles were retrieved using the Klett inversion (Klett, 1981). The first valid measurement is at 270 m due to the incomplete overlap between the laser and the field of view of the telescope closer to the surface (Wandinger, 2005).
- LIDAR of the JRC in Ispra, which operates at three different wavelengths: 1064 nm, 532 nm and 355 nm. The  $\beta_p$  and the  $\delta_p$  profiles of the lidar in Ispra have been retrieved using the ACTRIS-EARLINET (Aerosol, Clouds and Trace Gases Research Infrastructure-European Aerosol Research Lidar Network) Single Calculus Chain (<https://www.earlinet.org>).



## S8 Average mixing ratios and ratios between species measured during E-EU-06 over the Po Plain

**Table S8:** Mean (mean), standard deviation (std) and quartiles (25th, 50th, 75th) concentrations of a) selected measured trace gases, b) aerosol particles, and c) ratios between selected trace gases for the E-EU-06 flight over the Po Plain: Note that HCHO and NO<sub>2</sub> were remotely measured by the mini DOAS instrument. BC, NO<sub>3</sub><sup>-</sup>, SO<sub>4</sub><sup>2-</sup> are given for standard temperature and pressure conditions. The periods within the BL are marked in yellow.

a)

| flight legs                           |      | 6b-6c       | 6d-6e       | 6e-6f       | 6f-6g       | 6h-6i       | 6j-6k       | 6l-to CPP   | CPP         | CPP/GG      | 6l-6m       | 6n-6o       |
|---------------------------------------|------|-------------|-------------|-------------|-------------|-------------|-------------|-------------|-------------|-------------|-------------|-------------|
| time                                  |      | 09:52-10:00 | 10:02-10:10 | 10:10-10:20 | 10:21-10:37 | 10:39-10:54 | 10:57-11:10 | 11:19-11:30 | 11:30-11:50 | 11:50-12:07 | 11:19-12:06 | 12:10-12:19 |
| altitude (m)                          | mean | 1626        | 516         | 522         | 519         | 1631        | 3229        | 839         | 838         | 833         | 836         | 2579        |
|                                       | std  | 2           | 1           | 3           | 4           | 6           | 2           | 1           | 3           | 2           | 4           | 47          |
| CO (ppb)                              | mean | 135         | 126         | 131         | 122         | 109         | 79          | 127         | 117         | 118         | 120         | 80          |
|                                       | std  | 3           | 4           | 10          | 7           | 15          | 1           | 6           | 8           | 6           | 8           | 2           |
|                                       | 25th | 134         | 123         | 122         | 116         | 92          | 78          | 122         | 111         | 114         | 114         | 79          |
|                                       | 50th | 135         | 125         | 135         | 123         | 111         | 79          | 125         | 116         | 119         | 120         | 80          |
|                                       | 75th | 137         | 129         | 137         | 126         | 121         | 80          | 133         | 124         | 124         | 126         | 82          |
| SO <sub>2</sub> (ppt)                 | mean | 669         | 1895        | 1094        | 978         | 269         | 143         | 908         | 735         | 1318        | 991         | 116         |
|                                       | std  | 80          | 1025        | 391         | 327         | 158         | 21          | 131         | 239         | 642         | 512         | 19          |
|                                       | 25th | 611         | 1342        | 959         | 687         | 169         | 131         | 807         | 583         | 751         | 640         | 104         |
|                                       | 50th | 664         | 1671        | 1068        | 979         | 193         | 145         | 906         | 691         | 1198        | 827         | 115         |
|                                       | 75th | 723         | 2090        | 1224        | 1197        | 318         | 157         | 995         | 825         | 1792        | 1143        | 128         |
| NO (ppb)                              | mean | 0.20        | 0.27        | 0.27        | 0.21        | 0.16        | 0.09        | 0.24        | 0.41        | 0.74        | 0.49        | 0.04        |
|                                       | std  | 0.08        | 0.07        | 0.12        | 0.09        | 0.03        | 0.03        | 0.06        | 0.16        | 0.31        | 0.29        | 0.01        |
|                                       | 25th | 0.13        | 0.25        | 0.18        | 0.17        | 0.14        | 0.07        | 0.20        | 0.30        | 0.48        | 0.28        | 0.04        |
|                                       | 50th | 0.20        | 0.28        | 0.26        | 0.20        | 0.16        | 0.07        | 0.22        | 0.43        | 0.62        | 0.45        | 0.05        |
|                                       | 75th | 0.26        | 0.32        | 0.33        | 0.22        | 0.18        | 0.13        | 0.29        | 0.50        | 1.00        | 0.58        | 0.05        |
| NO <sub>2</sub> (ppt)                 | mean | 204         | 378         | 472         | 426         | 136         | 98          | 517         | 982         | 1360        | 1014        | 131         |
|                                       | std  | 11          | 49          | 45          | 53          | 30          | 10          | 84          | 285         | 487         | 468         | 14          |
|                                       | 25th | 200         | 335         | 438         | 390         | 106         | 92          | 449         | 768         | 977         | 655         | 122         |
|                                       | 50th | 206         | 360         | 470         | 421         | 137         | 96          | 478         | 891         | 1365        | 875         | 130         |
|                                       | 75th | 210         | 430         | 501         | 469         | 165         | 102         | 574         | 1106        | 1769        | 1329        | 138         |
| NO <sub>y</sub> (ppb)                 | mean | 7.2         | 3.0         | 6           | 4.1         | 3.5         | 0.9         | 5           | 7           | 8           | 7           | 1.1         |
|                                       | std  | 0.4         | 0.7         | 1           | 0.9         | 2           | 0.1         | 1           | 2           | 3           | 3           | 0.2         |
|                                       | 25th | 6.9         | 2.6         | 5           | 3.3         | 2           | 0.9         | 4           | 5           | 6           | 5           | 1.0         |
|                                       | 50th | 7.1         | 2.8         | 6           | 3.7         | 4           | 0.9         | 5           | 6           | 8           | 6           | 1.1         |
|                                       | 75th | 7.3         | 3.2         | 7           | 4.7         | 5           | 1.0         | 6           | 7           | 11          | 9           | 1.2         |
| RO <sub>2</sub> (ppt)                 | mean | 88          | 86          | 103         | 90          | 84          | 64          | 76          | 51          | 62          | 61          | 45          |
|                                       | std  | 8           | 8           | 11          | 10          | 20          | 3           | 10          | 11          | 22          | 18          | 13          |
|                                       | 25th | 81          | 81          | 97          | 86          | 70          | 62          | 70          | 44          | 50          | 49          | 38          |
|                                       | 50th | 89          | 85          | 100         | 92          | 81          | 62          | 76          | 51          | 63          | 58          | 44          |
|                                       | 75th | 95          | 91          | 108         | 97          | 93          | 64          | 82          | 57          | 81          | 74          | 48          |
| HCHO (ppt)                            | mean | 1299        | 1639        | 1919        | 1613        | 1046        | 541         | 1463        | 1680        | 2173        | 1806        | 544         |
|                                       | std  | 51          | 93          | 118         | 204         | 151         | 38          | 99          | 111         | 264         | 337         | 35          |
|                                       | 25th | 1256        | 1571        | 1844        | 1415        | 876         | 509         | 1391        | 1593        | 2037        | 1563        | 520         |
|                                       | 50th | 1325        | 1610        | 1932        | 1558        | 1117        | 550         | 1404        | 1685        | 2166        | 1722        | 533         |
|                                       | 75th | 1336        | 1732        | 1991        | 1801        | 1163        | 561         | 1556        | 1763        | 2274        | 2048        | 574         |
| C <sub>3</sub> H <sub>6</sub> O (ppt) | mean | 3205        | 2626        | 3437        | 2752        | 2332        | 1703        | 3319        | 2926        | 2855        | 3002        | 1726        |
|                                       | std  | 189         | 78          | 367         | 307         | 379         | 94          | 199         | 380         | 281         | 354         | 60          |
|                                       | 25th | 3030        | 2576        | 3396        | 2574        | 2016        | 1668        | 3163        | 2678        | 2747        | 2788        | 1703        |
|                                       | 50th | 3292        | 2580        | 3503        | 2640        | 2122        | 1721        | 3297        | 2863        | 2907        | 3053        | 1723        |
|                                       | 75th | 3321        | 2709        | 3564        | 2946        | 2724        | 1756        | 3472        | 3258        | 3056        | 3260        | 1757        |
| O <sub>3</sub> (ppb)                  | mean | 91          | 75          | 79          | 74          | 67          | 51          | 78          | 72          | 69          | 72          | 55          |
|                                       | std  | 4           | 3           | 5           | 3           | 13          | 1           | 4           | 3           | 5           | 5           | 2           |
|                                       | 25th | 89          | 73          | 74          | 72          | 54          | 51          | 75          | 70          | 64          | 69          | 54          |
|                                       | 50th | 92          | 74          | 81          | 74          | 69          | 51          | 77          | 72          | 70          | 73          | 55          |
|                                       | 75th | 93          | 77          | 83          | 75          | 77          | 52          | 81          | 73          | 74          | 75          | 56          |



b)

| flight legs                                        |      | 6b-6c        | 6d-6e       | 6e-6f       | 6f-6g       | 6h-6i       | 6j-6k       | 6l-to CPP   | CPP         | CPP/GG      | 6l-6m       | 6n-6o       |
|----------------------------------------------------|------|--------------|-------------|-------------|-------------|-------------|-------------|-------------|-------------|-------------|-------------|-------------|
| time                                               |      | 09:529-10:00 | 10:02-10:10 | 10:10-10:20 | 10:21-10:37 | 10:39-10:54 | 10:57-11:10 | 11:19-11:30 | 11:30-11:50 | 11:50-12:07 | 11:19-12:06 | 12:10-12:19 |
| altitude (m)                                       | mean | 1626         | 516         | 522         | 519         | 1631        | 3229        | 839         | 838         | 833         | 836         | 2579        |
|                                                    | std  | 2            | 1           | 3           | 4           | 6           | 2           | 1           | 3           | 2           | 4           | 47          |
| NO <sub>3</sub> <sup>-</sup> (μgm <sup>-3</sup> )  | mean | 5.4          | 0.21        | 2           | 0.3         | 1.46        | 0.06        | 1.2         | 2           | 1.4         | 2           | 0.06        |
|                                                    | std  | 0.6          | 0.08        | 1           | 0.4         | 1.48        | 0.02        | 0.7         | 1           | 1.0         | 1           | 0.02        |
|                                                    | 25th | 5.0          | 0.15        | 1           | 0.1         | 0.09        | 0.05        | 0.6         | 1           | 0.3         | 1           | 0.05        |
|                                                    | 50th | 5.4          | 0.16        | 2           | 0.2         | 1.07        | 0.06        | 1.1         | 1           | 1.6         | 1           | 0.06        |
|                                                    | 75th | 5.6          | 0.27        | 3           | 0.2         | 2.35        | 0.07        | 1.7         | 3           | 2.1         | 2           | 0.07        |
| SO <sub>4</sub> <sup>2-</sup> (μgm <sup>-3</sup> ) | mean | 2.0          | 2.2         | 1.9         | 2           | 1.27        | 0.62        | 2.3         | 1.4         | 1.6         | 1.7         | 0.64        |
|                                                    | std  | 0.1          | 0.4         | 0.3         | 1           | 0.49        | 0.05        | 0.2         | 0.1         | 0.2         | 0.4         | 0.09        |
|                                                    | 25th | 2.0          | 2.0         | 1.8         | 2           | 0.80        | 0.57        | 2.2         | 1.3         | 1.5         | 1.4         | 0.60        |
|                                                    | 50th | 2.0          | 2.2         | 1.9         | 2           | 1.23        | 0.61        | 2.3         | 1.4         | 1.6         | 1.5         | 0.65        |
|                                                    | 75th | 2.1          | 2.4         | 2.0         | 3           | 1.58        | 0.64        | 2.4         | 1.5         | 1.7         | 1.9         | 0.68        |
| BC (μgm <sup>-3</sup> )                            | mean | 0.4          | 0.4         | 0.4         | 0.4         | 0.21        | 0.09        | 0.4         | 0.4         | 0.4         | 0.4         | 0.08        |
|                                                    | std  | 0.1          | 0.1         | 0.1         | 0.1         | 0.13        | 0.06        | 0.1         | 0.1         | 0.1         | 0.1         | 0.05        |
|                                                    | 25th | 0.3          | 0.3         | 0.4         | 0.3         | 0.09        | 0.06        | 0.3         | 0.3         | 0.3         | 0.3         | 0.05        |
|                                                    | 50th | 0.4          | 0.4         | 0.4         | 0.4         | 0.21        | 0.07        | 0.4         | 0.4         | 0.4         | 0.4         | 0.07        |
|                                                    | 75th | 0.4          | 0.4         | 0.5         | 0.4         | 0.30        | 0.10        | 0.5         | 0.5         | 0.5         | 0.5         | 0.09        |

c)

| flight legs                      |      | 6b-6c       | 6d-6e       | 6e-6f       | 6f-6g       | 6h-6i       | 6j-6k       | 6l-to CPP   | CPP         | CPP/GG      | 6l-6m       | 6n-6o       |
|----------------------------------|------|-------------|-------------|-------------|-------------|-------------|-------------|-------------|-------------|-------------|-------------|-------------|
| time                             |      | 09:53-10:00 | 10:02-10:10 | 10:10-10:20 | 10:21-10:37 | 10:39-10:54 | 10:57-11:10 | 11:19-11:30 | 11:30-11:50 | 11:50-12:07 | 11:19-12:06 | 12:10-12:19 |
| altitude (m)                     | mean | 1626        | 516         | 522         | 519         | 1631        | 3229        | 839         | 838         | 833         | 836         | 2579        |
|                                  | std  | 2           | 1           | 3           | 4           | 6           | 2           | 1           | 3           | 2           | 4           | 47          |
| NO <sub>y</sub> /CO              | mean | 0.053       | 0.024       | 0.044       | 0.033       | 0.030       | 0.012       | 0.037       | 0.055       | 0.070       | 0.057       | 0.014       |
|                                  | std  | 0.003       | 0.005       | 0.007       | 0.007       | 0.010       | 0.002       | 0.009       | 0.017       | 0.025       | 0.023       | 0.002       |
|                                  | 25th | 0.052       | 0.021       | 0.038       | 0.027       | 0.018       | 0.011       | 0.028       | 0.042       | 0.048       | 0.039       | 0.013       |
|                                  | 50th | 0.053       | 0.022       | 0.046       | 0.032       | 0.033       | 0.011       | 0.038       | 0.052       | 0.068       | 0.051       | 0.014       |
|                                  | 75th | 0.054       | 0.026       | 0.049       | 0.038       | 0.038       | 0.013       | 0.045       | 0.062       | 0.086       | 0.072       | 0.015       |
| NO <sub>y</sub> /NO <sub>2</sub> | mean | 35          | 8.1         | 12          | 9           | 24          | 10          | 9           | 7           | 6           | 7           | 9           |
|                                  | std  | 3           | 1.0         | 2           | 1           | 7           | 2           | 2           | 2           | 1           | 2           | 1           |
|                                  | 25th | 33          | 7.4         | 10          | 8           | 17          | 9           | 8           | 5           | 5           | 6           | 8           |
|                                  | 50th | 35          | 8.1         | 13          | 9           | 25          | 10          | 8           | 7           | 6           | 7           | 8           |
|                                  | 75th | 37          | 8.6         | 14          | 10          | 28          | 11          | 10          | 8           | 7           | 8           | 9           |
| HCHO/CO                          | mean | 0.010       | 0.013       | 0.015       | 0.013       | 0.010       | 0.007       | 0.012       | 0.015       | 0.018       | 0.015       | 0.007       |
|                                  | std  | 0.000       | 0.001       | 0.001       | 0.002       | 0.001       | 0.001       | 0.001       | 0.001       | 0.002       | 0.003       | 0.000       |
|                                  | 25th | 0.009       | 0.012       | 0.014       | 0.012       | 0.009       | 0.006       | 0.011       | 0.014       | 0.017       | 0.013       | 0.006       |
|                                  | 50th | 0.010       | 0.013       | 0.015       | 0.013       | 0.010       | 0.007       | 0.012       | 0.015       | 0.018       | 0.015       | 0.007       |
|                                  | 75th | 0.010       | 0.014       | 0.015       | 0.014       | 0.010       | 0.007       | 0.012       | 0.015       | 0.019       | 0.018       | 0.007       |
| CO/BC                            | mean | 314         | 351         | 312         | 346         | 625         | 710         | 308         | 310         | 325         | 315         | 898         |
|                                  | std  | 18          | 46          | 52          | 46          | 270         | 63          | 61          | 43          | 62          | 55          | 137         |
|                                  | 25th | 305         | 309         | 299         | 317         | 390         | 680         | 270         | 278         | 274         | 271         | 809         |
|                                  | 50th | 309         | 348         | 304         | 344         | 510         | 690         | 276         | 309         | 321         | 311         | 898         |
|                                  | 75th | 318         | 396         | 310         | 358         | 890         | 717         | 358         | 348         | 363         | 356         | 963         |

## S9 COSMO wind simulation over the PP

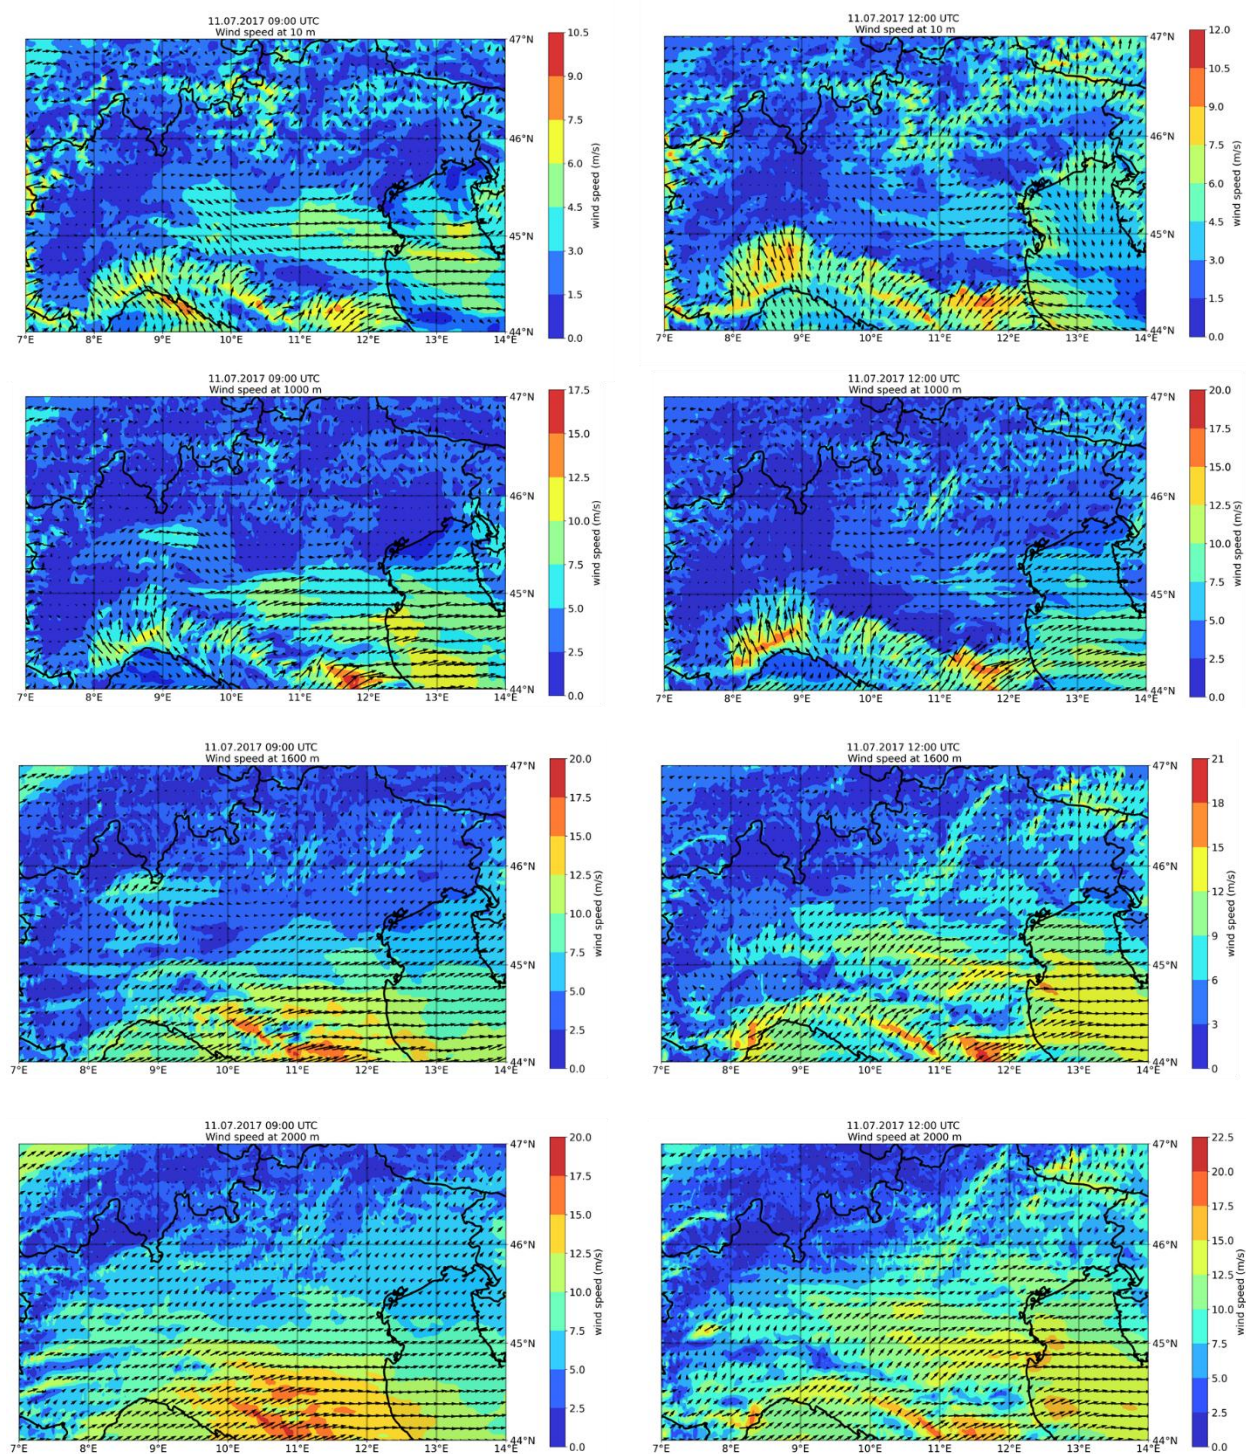

**Figure S9.1.** Wind simulation over the PP by COSMO on 11 July 2017 at 9 UTC (left) and 12 UTC (right) for 10 m, 1000 m, 1600 m, and 2000 m altitude a.s.l. Please note changes in the scale of the wind speed (ws).



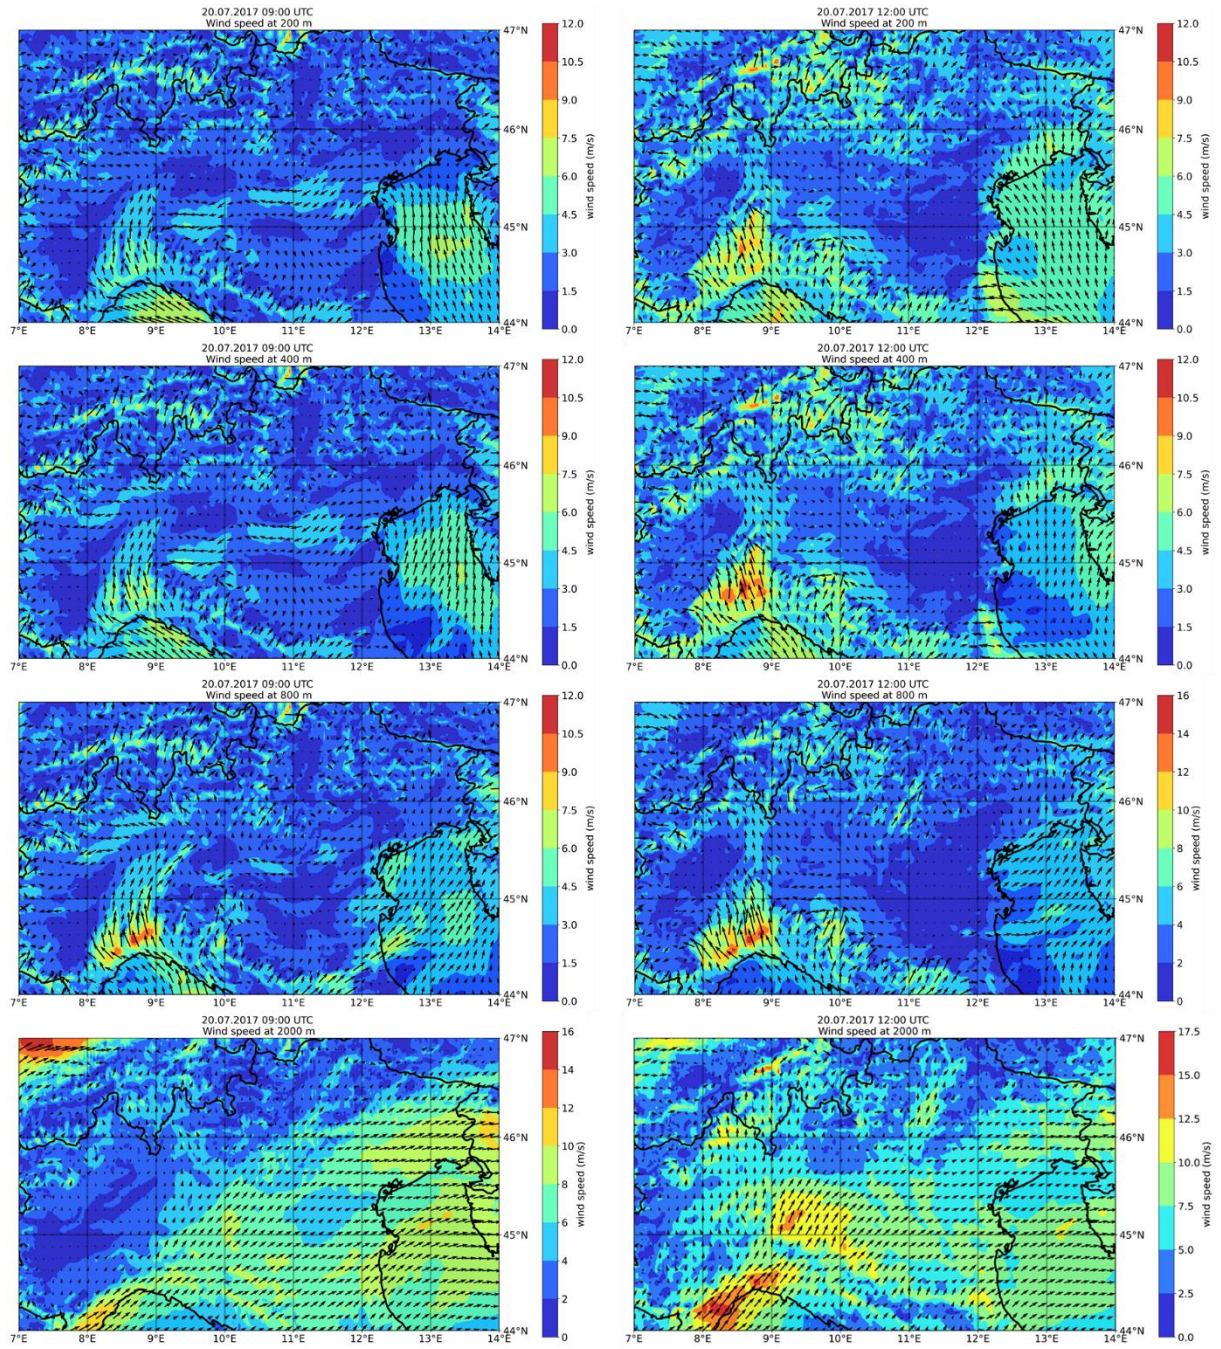

**Figure S9.2.** Wind simulation over the PP by COSMO on 20 July 2017 at 9 UTC (left) and 12 UTC (right) for 200 m, 400 m, 800 m, and 2000 m altitude a.s.l. Please note the changes in the scale of the wind speed.

## S10 Sensitivity study of COSMO-LAGRANTO wind field

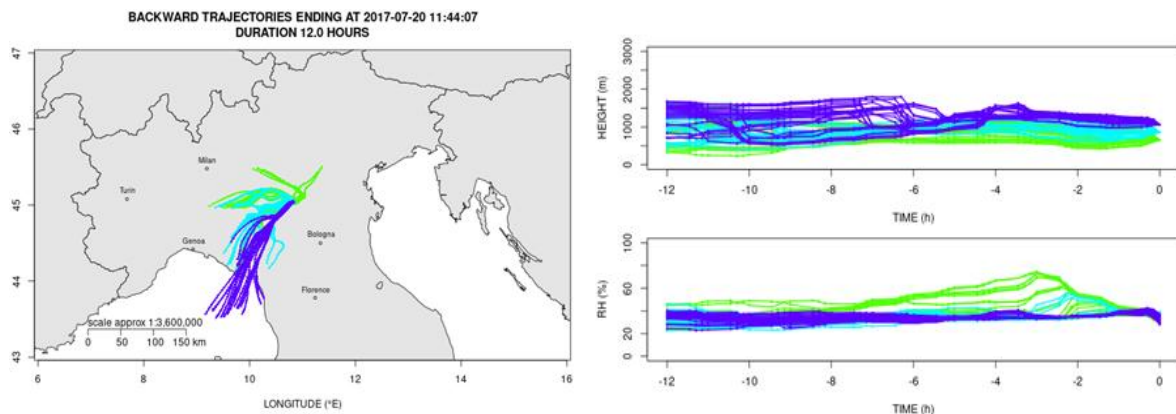

**Figure S10.** COSMO-LAGRANTO 12-hours back-trajectories from a selected point of the E-EU-06 flight track. Back-trajectories start inside a 2-km diameter circle at three different altitudes (green: HALO altitude – 200m, blue: HALO altitude of 840 m, purple: HALO altitude + 200m).

## S11 Ratios between airborne and ground-based measurements

**Table S11.** Values of the ratios between airborne measurement during E-EU-06 and the stations of Vinchio and S.Rocco presented in Fig. 15 in the main text. The track from East to West over the PP comprises 10 points, each corresponding to 10 min averages.

| #n of point | NO <sub>2</sub> HALO<br>/NO <sub>2</sub> Vinchio | NO <sub>y</sub> HALO<br>/NO <sub>x</sub> Vinchio | O <sub>3</sub> HALO<br>/O <sub>3</sub> Vinchio | CO HALO<br>/CO <sub>S.Rocco</sub> |
|-------------|--------------------------------------------------|--------------------------------------------------|------------------------------------------------|-----------------------------------|
| 1           | 0.13                                             | 1.35                                             | 1.61                                           | 1.45                              |
| 2           | 0.04                                             | 1.02                                             | 1.52                                           | 1.32                              |
| 3           | 0.03                                             | 0.35                                             | 1.10                                           | 0.99                              |
| 4           | 0.03                                             | 0.22                                             | 1.08                                           | 0.92                              |
| 5           | 0.14                                             | 1.30                                             | 1.61                                           | 1.47                              |
| 6           | 0.21                                             | 1.49                                             | 1.47                                           | 1.35                              |
| 7           | 0.30                                             | 1.92                                             | 1.49                                           | 1.37                              |
| 8           | 0.39                                             | 2.63                                             | 1.45                                           | 1.39                              |
| 9           | 0.24                                             | 1.67                                             | 1.25                                           | 1.28                              |
| 10          | 0.04                                             | 0.32                                             | 1.10                                           | 0.93                              |



## S12 Vertical profiles by Lidar & Ceilometers in the central PP area.

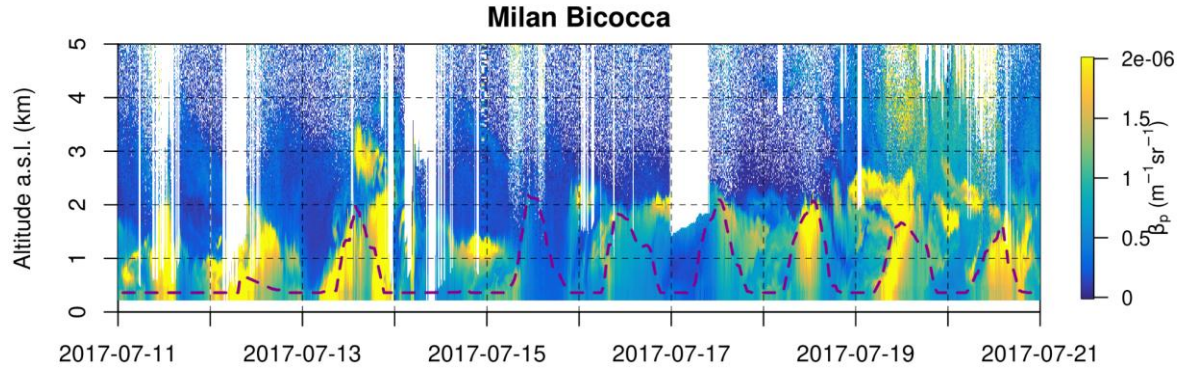

**Figure S12.1:** Continuous (0-24 UTC, x-axis) vertical profiles (0-5 km, y-axis) of aerosol backscatter at 1064 nm as observed by the ALICENET ALC system operating in Milan-Bicocca from July 11 to July 20, 2017. Cloud-affected profiles are filtered out from the cloud base upwards (white areas). The dashed line is the height of the Mixed Aerosol Layer (MAL) as derived from the Alicenet data processing (Bellini et al., 2024), it is artificially set to zero when persistence of clouds prevented the MAL retrieval.

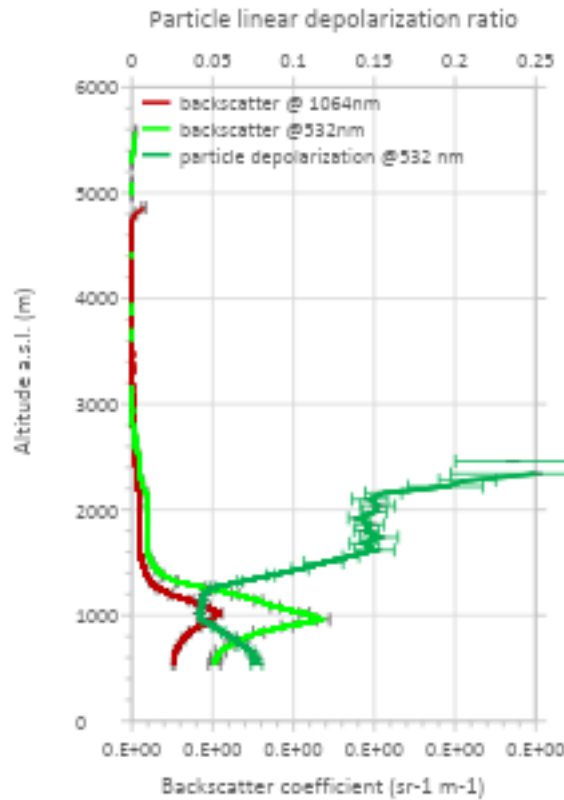

**Figure S12.2** Vertical profiles of the particle light backscatter coefficient at 1064 and 532 nm, and the linear depolarization ratio at 532 nm measured by the LiDAR in Ispra on the 11 July at 10:17-10:42 h (UTC)

### S13 Multi- Model Ensemble Desert Dust forecasts for the 20 July 2017

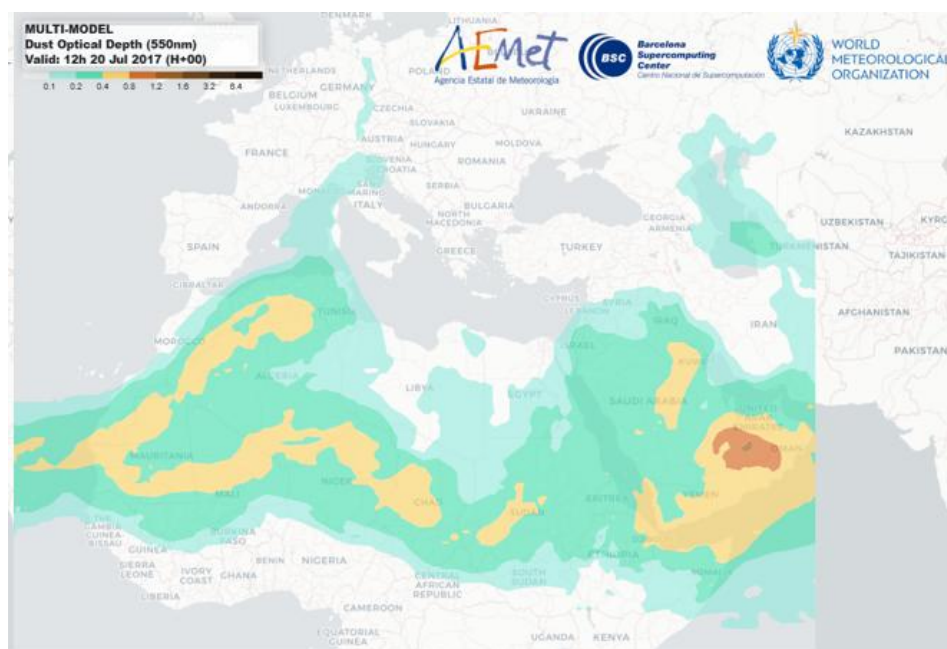

**Figure S13:** Dust Optical Depth at 550 nm derived from the Multimodel Ensemble at 12 UTC (i.e. approximately at the HALO overpass time) for July 20 2017, showing an optically thin desert dust layer advected over Northern Italy (credits: WMO Barcelona Dust Regional Center and the SDS-WAS)



## References:

Apituley, A. et al.: Research Infrastructures Services Reinforcing Air Quality Monitoring Capacities in European Urban & Industrial AreaS (GA n. 101036245), [https://riurbans.eu/wp-content/uploads/2024/04/RI-URBANS\\_D32\\_D4\\_11.pdf](https://riurbans.eu/wp-content/uploads/2024/04/RI-URBANS_D32_D4_11.pdf)

Bellini, A., Diémoz, H., Di Liberto, L., Gobbi, G. P., Bracci, A., Pasqualini, F., and Barnaba, F.: ALICENET – an Italian network of automated lidar ceilometers for four-dimensional aerosol monitoring: infrastructure, data processing, and applications, *Atmos. Meas. Tech.*, 17, 6119–6144, <https://doi.org/10.5194/amt-17-6119-2024>, 2024.

Boselli A. de Marco, C., Mocerino, L., Murena, F., Quaranta, F., Rizzuto, E., Sannino, A., Spinelli, N., and Xuan, W.: Evaluating LIDAR Sensors for the Survey of Emissions from Ships at Harbor. In: Okada T., Suzuki K., Kawamura Y. (eds) *Practical Design of Ships and Other Floating Structures. PRADS 2019. Lecture Notes in Civil Engineering*, vol 64. Springer, Singapore. [https://doi.org/10.1007/978-981-15-4672-3\\_49](https://doi.org/10.1007/978-981-15-4672-3_49), 2021.

Diner, D.J., Boland, S.W., Brauer, M., Bruegge, C., Burke, K.A., Chipman, R., Di Girolamo, L., Garay, M.J., Hasheminassab, S., Hyer, E., Jerrett, M., Jovanovic, V., Kalashnikova, O.V., Liu, Y., Lyapustin, A.I., Martin, R.V., Nastan, A., Ostro, B.D., Ritz, B., Schwartz, J., Wang, J., Xu, F.: Advances in multiangle satellite remote sensing of speciated airborne particulate matter and association with adverse health effects: from MISR to MAIA, *J. Appl. Remote Sens.* 12(4), 042603, doi: 10.1117/1.JRS.12.042603, 2018.

Rotach, M. W., Serafin, S., Ward, H. C., Arpagaus, M., Colfescu, I., Cuxart, J., De Wekker, S.F.J., Grubišić, V., Kalthoff, N., Karl, T., Kirshbaum, D.J., Lehner, M., Mobbs, S., Paci, A., Palazzi, E., Bailey, A., Schmidli, J., Wittmann, C., Wohlfahrt, G., and Zardi, D.: A Collaborative Effort to Better Understand, Measure, and Model Atmospheric Exchange Processes over Mountains. *Bull. Amer. Meteor. Soc.*, 103, E1282–E1295, <https://doi.org/10.1175/BAMS-D-21-0232.1>, 2022.
